# Supplementary material
Source: bioRxiv or medRxiv preprint supplement (https://medrxiv.org/highwire/filestream/76217/field_highwire_adjunct_files/0/2020.04.09.20059832-1.pdf)

**Supplementary Figure 1. Observed Cumulative Incidence, Deaths and Standardized Morbidity Ratios for Mainland China COVID-19 Epidemic.**

Figure is a graphical representation of data presented in **Table 2**. SMR are estimated as  $100 \times \text{observed incidence} / \text{expected incidence}$ , which in the context of a pandemic is approximately equal in all age groups, or somewhat higher in younger individuals.

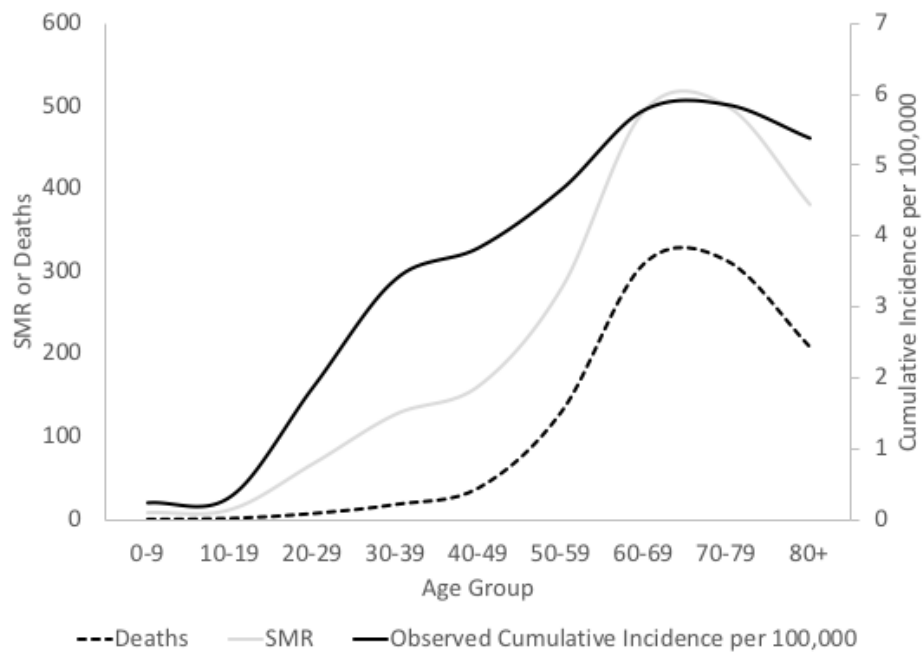

Supplement: Supplementary file [file 2020.04.09.20059832-1.pdf]
